FALL 2016 | VOLUME 14 | NUMBER 4

# Focus

The Journal of Lifelong Learning in Psychiatry

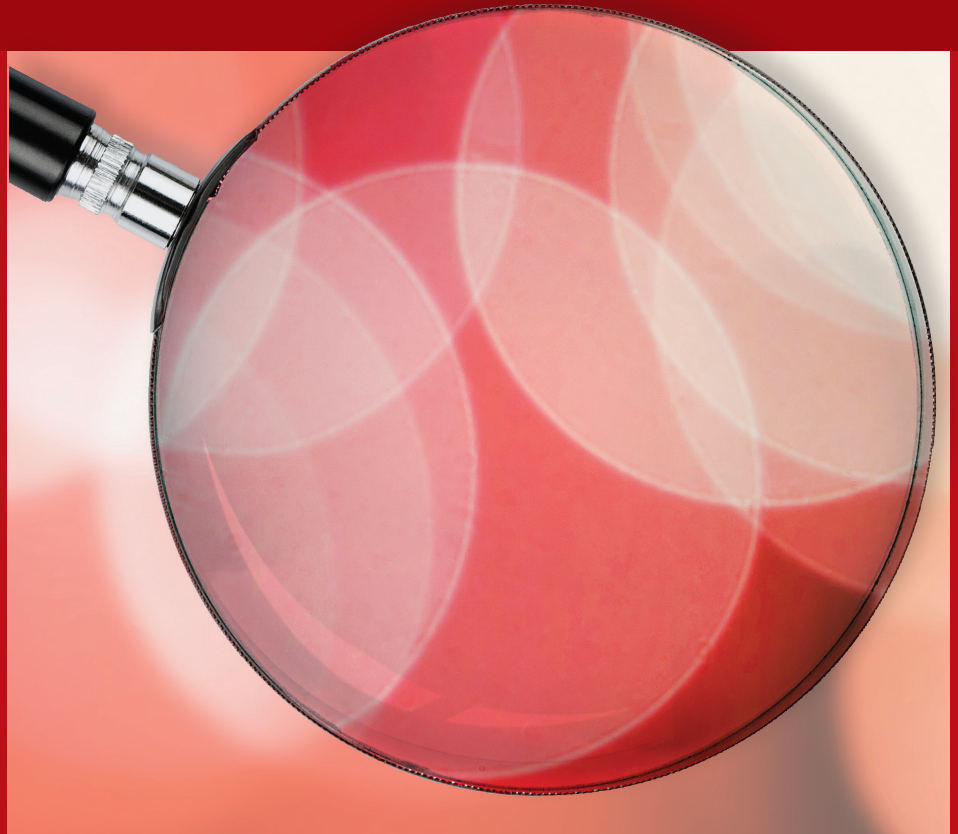

## Clinical Neuropsychiatry

Guest Editors: Margo Lauterbach, M.D., and Sheldon Benjamin, M.D.

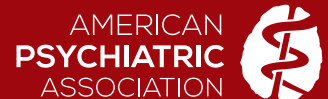

[focus.psychiatryonline.org](http://focus.psychiatryonline.org)
