# Smoking cigarettes won't help your patients' recovery. Quitting can.

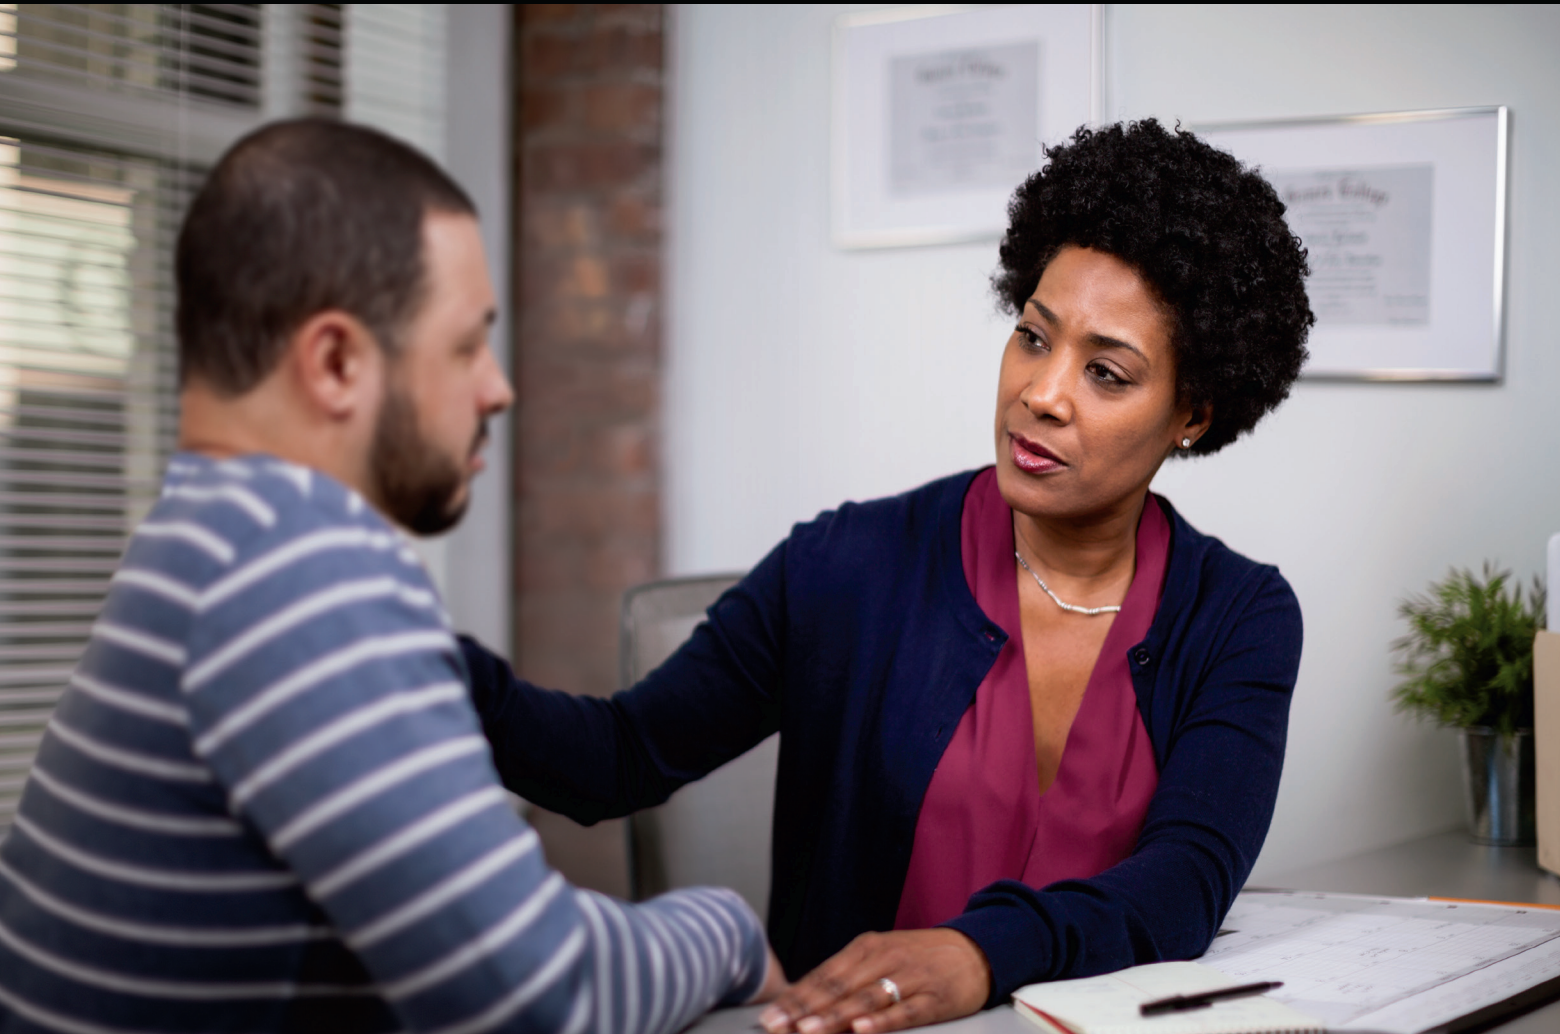

## TALK TO YOUR PATIENTS ABOUT QUITTING SMOKING.

Adults with mental health conditions smoke at rates at least twice that of the general population. Many want to quit smoking, and they can, but they need your support.

By including cessation as part of your treatment plan, you can improve more than just their physical health – you can improve their overall mental and emotional well-being.

Your support can help your patients successfully quit smoking and live longer, healthier, tobacco-free lives.

For more information on how you can help your patients quit smoking, visit [www.cdc.gov/TipsMentalHealth](http://www.cdc.gov/TipsMentalHealth).

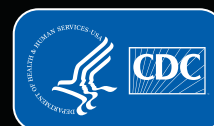

**U.S. Department of  
Health and Human Services**  
Centers for Disease  
Control and Prevention  
[CDC.gov/tips](http://CDC.gov/tips)

# Smoking and Mental Health: Five Things Every Health Care Provider Should Know

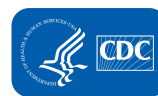

U.S. Department of  
Health and Human Services  
Centers for Disease  
Control and Prevention  
[CDC.gov/tips](http://CDC.gov/tips)

Providers who care for people with mental health conditions have an important role to play in reducing tobacco use among people with mental health conditions. There are five things that every provider should know before their next clinical encounter.

**1. Cigarette smoking is more common among adults with mental health conditions than in the general population.** People with mental health conditions smoke at rates that are at least two times higher than the general population.<sup>1</sup> They may also smoke more heavily and frequently, compared to those without mental health conditions. The Centers for Disease Control and Prevention estimates that nearly one third (31%) of all cigarettes consumed in the United States are smoked by people with mental health conditions.<sup>1</sup> The disproportionately high rates of smoking in this population are likely due to a combination of biological, psychological, and social factors that work together to create a unique vulnerability for tobacco dependence.<sup>2</sup> While the underlying causal mechanisms are not yet fully understood, one thing is clear - tobacco use among persons with mental health conditions can be prevented, and those who currently smoke can quit.

**2. Smokers with mental health conditions get sick, become disabled, and die early from smoking-related diseases.** The high rates of smoking among people with mental health conditions have devastating health consequences. Smoking-related diseases such as cardiovascular disease, lung disease, and cancer are among the most common causes of death among adults with mental health conditions.<sup>3</sup> Despite the heavy disease burden, smoking cessation interventions are not routinely offered within mental health care settings. A US national survey of mental health treatment facilities found that only about one-quarter provided services to help patients quit smoking.<sup>4</sup> There is a growing recognition among healthcare providers that the integration of tobacco dependence treatment into mental health care is an important part of mental health recovery and wellness. Many providers and facilities have made progress in reducing smoking in their facilities and among their patients; others are just now beginning to address tobacco use.<sup>5</sup>

**3. Many smokers with mental health conditions want to, and are able to quit smoking.** A common misconception among health care providers is that smokers with mental health conditions either cannot or will not give up smoking.<sup>6</sup> However, research has shown that adult smokers with mental health conditions—like other smokers—want to quit, can quit, and benefit from proven smoking cessation treatments. In clinical studies, adults with mental health conditions are just as likely to want to quit smoking as those without such conditions.<sup>7</sup> People with mental health conditions may face unique challenges in quitting smoking and may benefit from additional services, such as more intensive counseling and/or longer use or a combination of cessation medications. But with support, they can, and do quit smoking successfully.<sup>8,9</sup>

**4. Quitting smoking will not interfere with mental health recovery, and may have mental health benefits.** Another common misconception among some providers is that smoking has mental health benefits and helps patients cope with their psychiatric symptoms.<sup>6</sup> But research suggests otherwise; smoking is not an

effective mental health treatment strategy. On the contrary, smoking is associated with poor clinical outcomes, such as greater depressive symptoms, greater likelihood of psychiatric hospitalization, and increased suicidal behavior.<sup>10,11</sup> Furthermore, smoking can complicate treatment by accelerating the metabolism of certain psychiatric medications, resulting in the need for higher doses to get the same therapeutic benefit.<sup>6</sup> A large body of clinical research has shown that patients can quit without worsening their psychiatric symptoms, if they are given the appropriate support (e.g., behavioral counseling, cessation medication, and monitoring).<sup>8,9</sup> Evidence also suggests that quitting smoking is associated with mental health benefits. In several clinical and epidemiological studies, smoking cessation has been associated with significant reductions in depression and anxiety, lower rates of re-hospitalization, and lower rates of suicide.<sup>10,11,12,13,14</sup> A recent systematic review found that smoking cessation was associated with marked improvements in mental health over time, whereas continued smoking was associated with little change over the same period.<sup>15</sup>

**5. Providing smoking cessation assistance is an important part of mental health treatment.** Providers who care for people with mental health conditions are well positioned to help patients successfully quit tobacco use and enjoy the mental, emotional, and physical benefits of a tobacco-free life. Smoking cessation treatments work, and it's important to make them available to all people who want to quit, including people with mental health conditions. Providers can do their part by making tobacco cessation part of an overall approach to treatment and wellness.

- Ask patients if they smoke cigarettes or use other forms of tobacco; if they do, strongly advise them to quit.
- Assist patients who are ready to quit by offering proven quitting treatments, including tailored cessation assistance.
  - Refer patients interested in quitting to the 'I'm Ready to Quit!' page on the *Tips* website, 1-800-QUIT-NOW, [www.smokefree.gov](http://www.smokefree.gov), or other resources.
  - Provide counseling, support, and stop-smoking medicines.
- Monitor and adjust mental health medicines as needed in patients trying to quit smoking.
- See [www.cdc.gov/tipsmentalhealth](http://www.cdc.gov/tipsmentalhealth) for more information and free downloadable tools to help patients quit smoking.
  - Learn more about how to help people with mental health conditions quit smoking: <http://www.ctri.wisc.edu/providers-behavioral-health.htm>
  - Download free smoking cessation guides and toolkits designed for providers who care for patients with mental health conditions: <https://smokingcessationleadership.ucsf.edu/behavioral-health/resources/toolkits>
  - Watch a brief video with step-by-step instructions for offering smoking cessation assistance in health care settings: <https://www.youtube.com/watch?v=3VvhA1x0pY>

## References

1. Centers for Disease Control and Prevention. (2013). Vital signs: Current cigarette smoking among adults aged ≥ 18 years with mental illness—United States, 2009–2011. *Morbidity and Mortality Weekly Report*, 62(5), 81–7.
2. Ziedonis, D., Hitsman, B., Beckham, J. C., Zvolensky, M., Adler, L. E., Audrain-McGovern, J., Breslau, N., et al. (2008). Tobacco use and cessation in psychiatric disorders: National Institute of Mental Health report. *Nicotine & Tobacco Research*, 10(12), 1-25.
3. Druss, B. G., Zhao, L., Von Esenwein, S., Morrato, E. H., & Marcus, S. C. (2011). Understanding excess mortality in persons with mental illness: 17-Year follow up of a nationally representative US survey. *Medical Care*, 49(6), 599-604.
4. Substance Abuse and Mental Health Services Administration. (2014). The National Mental Health Services Survey (NMHSS) data spotlight report, November 25, 2014. [http://www.samhsa.gov/data/sites/default/files/Spot148\\_NMHSS\\_Smoking\\_Cessation/NMHSS-Spot148-QuitSmoking-2014.pdf](http://www.samhsa.gov/data/sites/default/files/Spot148_NMHSS_Smoking_Cessation/NMHSS-Spot148-QuitSmoking-2014.pdf). Accessed January 15, 2016.
5. Christianson, B. (in press). Measuring the integration of tobacco policy and treatment into the behavioral health care delivery system: How are we doing? *Journal of Health Care for the Poor and Underserved*.
6. Prochaska, J. J. (2011). Smoking and mental illness — Breaking the link. *New England Journal of Medicine*, 365(3), 196-198.
7. Siru, R., Hulse, G. K., & Tait, R. J. (2009). Assessing motivation to quit smoking in people with mental illness: a review. *Addiction*, 104(5), 719-733.
8. Tidey, J. W. & Miller, M. E. (2015). Smoking cessation and reduction in people with chronic mental illness. *British Medical Journal*, 351: h4065.
9. Evins, A. E., Cather, C., & Laffer, A. (2015). Treatment of tobacco use disorders in smokers with serious mental illness: Toward clinical best practices. *Harvard Review of Psychiatry*, 23(2), 90-8.
10. Khaled, S. M., Bulloch, A. G., Williams, J. V., Hill, J. C., Lavorato, D. H., & Patten, S. B. (2012). Persistent heavy smoking as risk factor for Major Depression (MD) incidence: Evidence from a longitudinal Canadian cohort of the National Population Health Survey. *Journal of Psychiatric Research* 46(4), 436-443.
11. Berlin, I., Hakes, J. K., Hu, M. C., & Covey, LS (2015). Tobacco use and suicide attempt: Longitudinal analysis with retrospective reports. *PLoS ONE*, 10(4): e0122607.
12. Cavazos-Rehg, P. A., Breslau, N., Hatsukami, N., Krauss, M. J., Spitznagel, E. L., Gruzca, R. A., Salyer, P., et al. (2014). Smoking cessation is associated with lower rates of mood/anxiety and alcohol use disorders. *Psychological Medicine*, 44(12), 2523-2535.
13. Kahler, C. W., Spillane, N. S., Busch, A. M., & Leventhal, A. M. (2011). Time-varying smoking abstinence predicts lower depressive symptoms following smoking cessation treatment. *Nicotine & Tobacco Research*, 13(2), 146–150.
14. Prochaska, J. J., Hall, S. E., Delucchi, K., & Hall, S. (2014). Efficacy of initiating tobacco dependence treatment in inpatient psychiatry: A randomized controlled trial. *American Journal of Public Health* 104(8), 1557-1565.
15. Taylor, G., McNeil, A., Girling, A., Farley, A., Lindson-Hawley, N., & Aveyard, P. (2014). Change in mental health after smoking cessation: systematic review and meta-analysis. *British Medical Journal*, 348: g1151.

# New Titles on Geriatric Psychiatry

NEW!

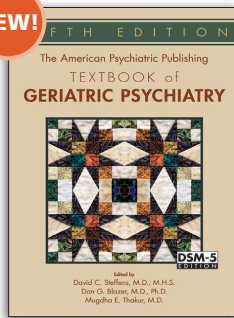

Available online at  
[Psychiatryonline.org](http://Psychiatryonline.org)

## The American Psychiatric Publishing Textbook of Geriatric Psychiatry, Fifth Edition

*Edited by David C. Steffens, M.D., M.H.S., Dan G. Blazer, M.D., Ph.D., and Mugdha E. Thakur, M.D.*

This Fifth Edition is an indispensable resource for psychiatric clinicians and trainees charged with assessing, diagnosing, and treating mental disorders in our nation's burgeoning population of older adults, as well as the nurses and other professionals who provide critically important care day to day. Building on the prodigious strengths of previous editions, this revision is the most current, comprehensive, and systematic textbook of geriatric psychiatry available today, and the only one that is DSM-5® concordant.

Widely recognized as the standard in its field, the book serves a critical need for clinicians challenged to meet the mental health needs of an aging population.

2015 • 837 pages • ISBN 978-1-58562-484-3 • Hardcover • \$187.00 • Item #62484

2015 • 837 pages • ISBN 978-1-58562-522-2 • eBook • \$150.00 • Item #62522

2015 • 12 Month Subscription • Online at [Psychiatryonline.org](http://Psychiatryonline.org) • \$155.00 • Item #537005

NEW!

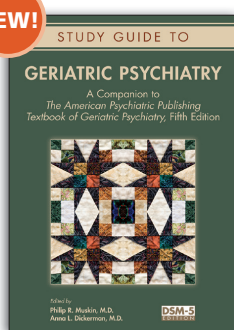

## Study Guide to Geriatric Psychiatry

**A Companion to The American Psychiatric Publishing Textbook of Geriatric Psychiatry, Fifth Edition**

*Philip R. Muskin, M.D., and Anna L. Dickerman, M.D.*

*Study Guide to Geriatric Psychiatry* is a question-and-answer companion that allows you to evaluate your mastery of the subject matter as you progress through *The American Psychiatric Publishing Textbook of Geriatric Psychiatry*, Fifth Edition. The *Study Guide* is made up of approximately 255 questions divided into 25 individual quizzes that correspond to chapters in the textbook. Questions are followed by an answer guide that references relevant text in the textbook. Each answer is accompanied by a discussion that not only addresses the correct response but also explains why other responses are not correct.

2017 • 352 pages • ISBN 978-1-61537-045-0 • Paperback • \$62.00 • Item #37045

2017 • 352 pages • ISBN 978-1-61537-106-8 • eBook • \$50.00 • Item #37106

NEW!

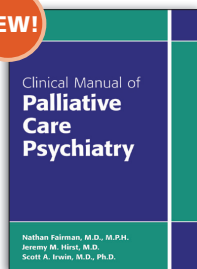

## Clinical Manual of Palliative Care Psychiatry

*Nathan Fairman, M.D., M.P.H., Jeremy M. Hirst, M.D., and Scott A. Irwin, M.D., Ph.D.*

The book seeks to bridge the gulf between principles and practice for two groups of clinicians: front-line palliative care providers with little mental health training and mental health specialists who may lack familiarity with palliative care practice. The book reviews palliative care principles and practice models, treatment of the psychiatric symptoms most commonly encountered in palliative care settings.

2016 • 297 pages • ISBN 978-1-58562-476-8 Paperback • \$59.00 • Item #62476

2016 • 297 pages • ISBN 978-1-61537-061-0 • eBook • \$47.00 • Item #37061

NEW!

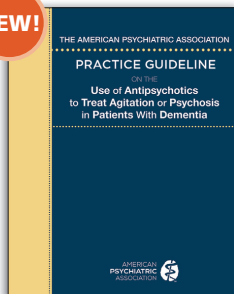

COMING  
DECEMBER 2016!

## The American Psychiatric Association Practice Guideline on the Use of Antipsychotics to Treat Agitation or Psychosis in Patients With Dementia

*American Psychiatric Association*

The guideline offers clear, concise, and actionable recommendation statements to help clinicians to incorporate recommendations into clinical practice, with the goal of improving quality of care. Each recommendation is given a rating that reflects the level of confidence that potential benefits of an intervention outweigh potential harms.

2016 • 218 pages • ISBN 978-0-89042-677-7 • Paperback • \$65.00 • Item #2677

2016 • 218 pages • ISBN 978-0-89042-678-4 • eBook • \$52.00 • Item #2678

## DSM-5® Pocket Guide for Elder Mental Health

*Sophia Wang, M.D., and Abraham M. Nussbaum, M.D., FAPA*

2017 • 375 pages • ISBN 978-1-61537-056-6 • Paperback • \$65.00 • Item #37056

2017 • 375 pages • ISBN 978-1-61537-119-8 • eBook • \$52.00 • Item #37119

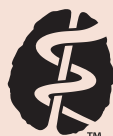

**American Psychiatric Association  
Publishing**

*Editorial Director, Journals*  
Michael D. Roy  
*Production Manager, Journals*  
Wendy Lieberman Taylor  
*Publisher*  
Rebecca D. Rinehart

**American Psychiatric Association  
Department of Continuing  
Medical Education**

*Associate Director, Focus*  
Kristen Moeller  
*Editorial Services Manager*  
Miriam Epstein  
*Editorial Manager, CME and MOC  
Examinations and Books*  
Ann Thomas

Focus, a journal of the American Psychiatric Association published by American Psychiatric Association Publishing

ISSN 1541-4094. Printed in the United States.

Published quarterly. Periodicals postage paid at Arlington, VA, and additional mailing offices. POSTMASTER: Send address changes to Focus, Circulation Department, American Psychiatric Association Publishing, 1000 Wilson Blvd., Suite 1825, Arlington, VA 22209-3901.

**Subscriptions**

U.S. APA member \$394, U.S. non-member \$616. For additional subscription options, including international and student rates, contact Customer Service at (703) 907-7300 or (800) 368-5777.

**Officers of the Association**

Maria A. Oquendo, M.D., President  
Anita S. Everett, M.D., President-Elect  
Altha J. Stewart, M.D., Secretary  
Saul Levin, M.D., M.P.A., CEO and Medical Director

**Editorial Offices**

Telephone: (703) 907-8637  
Fax: (703) 907-7849  
Journal Web site: [focus.psychiatryonline.org](http://focus.psychiatryonline.org)  
Focus CME: [psychiatryonline.org/cme](http://psychiatryonline.org/cme)

**Change of Address and Assistance  
With Subscriptions**

Contact Customer Service at (703) 907-7322 or (800) 368-5777 or e-mail [appi@psych.org](mailto:appi@psych.org).

**CME**

Telephone: (703) 907-8637, Fax: (703) 907-7849, Email: [educme@psych.org](mailto:educme@psych.org)

**Online Access**

Call (800) 368-5777 or e-mail [appi@psych.org](mailto:appi@psych.org) for assistance with online access to Focus and CME activities.

Copyright © 2016, American Psychiatric Association

# Focus

The Journal of Lifelong Learning in Psychiatry

## Editorial Board

### Editor

Mark Hyman Rapaport, M.D.  
*Atlanta, Georgia*

### Patient Management Exercise

Ian A. Cook, M.D.  
*Los Angeles, California*  
B. Harrison Levine, M.D., M.P.H.  
*Watertown, New York*

### Ethics Commentary

Laura B. Dunn, M.D.  
*Palo Alto, California*  
Laura Weiss Roberts, M.D.  
*Palo Alto, California*

### Communication Commentary

Dorothy E. Stubbe, M.D.  
*New Haven, Connecticut*

### Safety Commentary

Yad M. Jabbarpour, M.D.  
*Catawba, Virginia*

### Senior Advisory Board

Carol A. Bernstein, M.D.  
*New York, New York*  
Kathleen T. Brady, M.D., Ph.D.  
*Charleston, South Carolina*  
Peter F. Buckley, M.D.  
*Augusta, Georgia*  
Pedro L. Delgado, M.D.  
*Little Rock, Arkansas*  
Glen O. Gabbard, M.D.  
*Houston, Texas*  
Ira M. Lesser, M.D.  
*Torrance, California*  
Charles F. Reynolds III, M.D.  
*Pittsburgh, Pennsylvania*  
Pedro Ruiz, M.D.  
*Houston, Texas*  
Stephen C. Scheiber, M.D.  
*Glenview, Illinois*  
Daniel K. Winstead, M.D.  
*New Orleans, Louisiana*  
Joel Yager, M.D.  
*Denver, Colorado*

### Editorial Board

Richard Balon, M.D.  
*Rochester Hills, Michigan*  
Joseph A. Cheong, M.D.  
*Nashville, Tennessee*  
Donald M. Hilty, M.D.  
*Sacramento, California*  
Avram H. Mack, M.D.  
*Philadelphia, Pennsylvania*

Vishal Madaan, M.D.  
*Charlottesville, Virginia*  
Gail H. Manos, M.D.  
*Portsmouth, Virginia*  
Cheryl F. McCartney, M.D.  
*Chapel Hill, North Carolina*  
Philip R. Muskin, M.D.  
*New York, New York*  
Michele T. Pato, M.D.  
*Brooklyn, New York*  
Victor I. Reus, M.D.  
*San Francisco, California*  
Cynthia W. Santos, M.D.  
*Houston, Texas*  
Deborah Spitz, M.D.  
*Chicago, Illinois*  
James W. Thompson, M.D., M.P.H.  
*Palm Beach, Florida*  
Joyce A. Tinsley, M.D., M.S.  
*Farmington, Connecticut*  
Sidney Zisook, M.D.  
*San Diego, California*

### Associate Editors eFOCUS

David L. Fogelson, M.D.  
*Los Angeles, California*  
Robert J. Boland, M.D.  
*Boston, Massachusetts*

### Focus Self-Assessment Editorial Board

Robert J. Boland, M.D.  
*Boston, Massachusetts*  
Arden D. Dingle, M.D.  
*Harlingen, Texas*  
Laura Fochtmann, M.D.  
*Stony Brook, New York*  
James W. Jefferson, M.D.  
*Madison, Wisconsin*  
Vishal Madaan, M.D.  
*Charlottesville, Virginia*  
Annette M. Matthews, M.D.  
*Portland, Oregon*  
Lindsay J. Moskowitz, M.D.  
*New Hyde Park, New York*  
Shawn Sidhu, M.D.  
*Albuquerque, New Mexico*  
Marcia Verduin, M.D.  
*Orlando, Florida*  
Randon S. Welton, M.D.  
*Dayton, Ohio*  
Eric R. Williams, M.D.  
*Columbia, South Carolina*

Please visit the journal's Web site at [focus.psychiatryonline.org](http://focus.psychiatryonline.org)

# Focus

The Journal of Lifelong Learning in Psychiatry

## EDUCATIONAL OBJECTIVES

*Focus*, the APA clinical review and continuing medical education (CME) journal, is designed as a personal study resource to help practicing psychiatrists keep abreast of significant advances in the field, with particular attention to clinical practice.

With each issue, participants review current knowledge, recognize gaps in learning, and increase their understanding of an important topic in the field of psychiatry.

Participants also can prepare for an annual self-assessment designed to aid the physician in addressing areas where more study is needed to enhance management of patients.

## TO EARN CME CREDIT

Each issue, prepared by distinguished faculty who are recognized leaders in their fields, incorporates a CME component. To earn CME credit for *Focus*, subscribers should read through the material presented in each issue. After reading the material, complete the CME Quiz online at [focus.psychiatryonline.org](http://focus.psychiatryonline.org), and earn credit with a passing score of 60%.

## ACCREDITATION AND DESIGNATION

The American Psychiatric Association is accredited by the Accreditation Council for Continuing Medical Education to provide CME for physicians. The APA designates this journal-based CME activity for a maximum of 5 AMA PRA Category 1 credits™. Physicians should claim only the credit commensurate with the extent of their participation in the activity.

Neither the American Psychiatric Association nor American Psychiatric Association Publishing holds itself responsible for statements made in its publications by contributors. Unless so stated, material in *Focus* does not reflect the endorsement, official attitude, or position of the American Psychiatric Association, American Psychiatric Association Publishing, or the journal's Editorial Board.

Material published in the journals of the American Psychiatric Association is protected by copyright and all rights are reserved. Material may not be reproduced in any form or by any means without written permission from the copyright owner. For permission to reproduce material from American Psychiatric Association journals, please visit [www.appi.org/CustomerService/Pages/Permissions.aspx](http://www.appi.org/CustomerService/Pages/Permissions.aspx) for more information. Permission can also be secured through the Copyright Clearance Center ([www.copyright.com](http://www.copyright.com)). For bulk reprints, please contact Jane Cha at 703-907-7889; e-mail: [jcha@psych.org](mailto:jcha@psych.org).

This consent does not extend to other kinds of copying, such as copying for general distribution, for advertising or promotional purposes, for creating new collective works, or for resale. Permission need not be obtained for photocopying isolated articles for nonprofit classroom or library reserve use; all fees associated with such permission are waived.

"Lifelong Learning in Psychiatry" is an evolving series of educational initiatives developed by the American Psychiatric Association to meet the changing needs of psychiatrists for the 21st century.

*Focus* offers clinical reviews and original research for practicing psychiatrists to keep abreast of significant advances in the field. Developed as part of APA's "Lifelong Learning in Psychiatry" series—educational initiatives to meet the changing needs of psychiatrists for the 21st century—*Focus* has as its goal the dissemination of up-to-date information while facilitating lifelong study skills and critical self-assessment for improving patient care and preparation for maintenance of certification. Each issue is designed as a personal study resource with particular attention to clinical practice and offers opportunities to earn AMA PRA Category 1 Credit™.

## The American Board of Psychiatry and Neurology

The American Board of Psychiatry and Neurology has reviewed *Focus: The Journal of Lifelong Learning in Psychiatry* and the *Focus Self-Assessment Examination* and has approved this program as part of a comprehensive lifelong learning and self-assessment program, which is mandated by the American Board of Medical Specialties as a necessary component of maintenance of certification.

## Royal College of Physicians and Surgeons of Canada

The *Focus Self-Assessment Examination* (Vol. 14) is an accredited self-assessment program (Section 3) as defined by the Maintenance of Certification Program of the Royal College of Physicians and Surgeons of Canada and was approved by the Canadian Psychiatric Association on Oct. 1, 2016. This program expires Oct. 31, 2019. Remember to visit MAINPORT (<https://www.mainport.org/mainport/>) to record your learning and outcomes. You may claim a maximum of 24 hours (credits are automatically calculated).

## American Academy of Physician Assistants

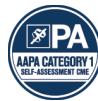

The *Focus Self-Assessment CME Program* for Volumes 11–12 has been reviewed and is approved for a maximum of 24 AAPA Category 1 Self-Assessment CME credits by the Physician Assistant Review Panel. Approval is valid until Oct. 31, 2017. Physician assistants should claim credit commensurate with only the extent of their participation in the activity. This program was planned in accordance with AAPA's CME Standards.

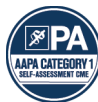

The Performance Improvement CME programs marked on the next page with an asterisk have been reviewed and are approved for a maximum of 20.00 AAPA Category 1 PI-CME credits by the Physician Assistant Review Panel. Total number of approved credits for each stage of this PI-CME program are as follows: Stage A: 5.0 AAPA Category 1 PI-CME credits; Stage B: 5.0 AAPA Category 1 PI-CME credits; Stage C: 5.0 AAPA Category 1 PI-CME credits. Bonus for completion of all three stages: 5.0 AAPA Category 1 PI-CME credits. Approval is valid until dates listed below. Physician Assistants should claim only the credit commensurate with the extent of their participation in the activity. This program was planned in accordance with AAPA's CME Standards.

**Editor and Advisor Program Planner Disclosure Listing for *Focus*, eFOCUS and *Focus*, Self-Assessment Editors, Associate Editors, Editorial Boards, and staff:**

Kathleen T. Brady, M.D., Consultant: Ovation, Alkermes, Teva. Peter F. Buckley, M.D., Ph.D., Co-investigator: Ameritox, Auspex Pharmaceuticals, Alkermes, Posit Science Corporation. Ian A. Cook, M.D., Research support: NeoSync, NIH, AHRQ/APA; Advisor/Consultant: NeuroSigma, NIH (ITVA member), VA (DSM member); Intellectual Property: assigned to UCLA and licensed to NeuroSigma, Inc.; Stock options: NeuroSigma, Inc. James W. Jefferson, M.D., Stock Shareholder: BMS, GlaxoSmithKline, SciClone, Supernus, Purdue; Principal: Healthcare Technology Systems, Inc. Vishal Madaan, M.D., M.B.B.S., Research Support: Pfizer, Forest, Shire, Sunovion. Victor I. Reus, M.D., Stock Shareholder: Exelixis. Charles F. Reynolds III, M.D., Pharmaceutical Supplies for NIH-sponsored clinical trials from Bristol-Myers Squibb, Pfizer. Laura Weiss Roberts, M.D., M.A., Owner: Terra Nova Learning Systems. Cynthia W. Santos, M.D., Research Support: Curemark. Joyce A. Tinsley, M.D., Employee (spouse): Sanofi. Marcia L. Verduin, M.D., Scientific Advisory Board: Lake Nona Life Project, sponsored by Lake Nona Institute and Johnson & Johnson.

**Editors and Members of the Editorial Boards of *Focus* and the *Focus* Self-Assessment and staff listed below report no disclosures:**

Richard Balon, M.D., Carol A. Bernstein, M.D., Robert J. Boland, M.D., Josepha A. Cheong, M.D., Pedro L. Delgado, M.D., Arden D. Dingle, M.D., Laura B. Dunn, M.D., David L. Fogelson, M.D., Laura Fochtmann, M.D., Glen O. Gabbard, M.D., Tristan Gorrindo, M.D., Donald M. Hilty, M.D., Yad M. Jabbarpour, M.D., Ira M. Lesser, M.D., B. Harrison Levine, M.D., Avram H. Mack, M.D., Gail H. Manos, M.D., Annette M. Matthews, M.D., Cheryl F. McCartney, M.D., Kristen Moeller, Lindsay J. Moskowitz, M.D., Philip R. Muskin, M.D., Michele T. Pato, M.D., M.P.H., Mark H. Rapaport, M.D., Pedro Ruiz, M.D., Stephen C. Scheiber, M.D., Shawn Sidhu, M.D., Deborah Spitz, M.D., Dorothy E. Stubbe, M.D., James W. Thompson, M.D., M.P.H., Randon S. Welton, M.D., Eric R. Williams, M.D., Daniel K. Winstead, M.D., Joel Yager, M.D., Sidney Zisook, M.D.

Contact American Psychiatric Association, Department of CME, educme@psych.org for information regarding revised end dates and updates to the clinical modules. All Performance in Practice modules published in *Focus* are available to all *Focus* subscribers.

**Improvement in Medical Practice/Performance in Practice (PIP) Clinical Modules Published in *Focus***

The American Board of Psychiatry and Neurology has approved the following *Focus* Performance in Practice clinical chart review tools of the American Psychiatric Association as Maintenance of Certification, Part 4, Clinical Modules.

|                                                                                                                                                           |                       |
|-----------------------------------------------------------------------------------------------------------------------------------------------------------|-----------------------|
| *Performance in Practice: Physician Assessment Module for the Screening of Adults With Substance Use Disorder                                             | Feb 2011–Feb 2017     |
| *Performance in Practice: Physician Assessment Module for the Assessment and Treatment of Adults With Substance Use Disorder                              | Feb 2011–Feb 2017     |
| *Performance in Practice: Physician Assessment Tool for the Care of Adults With Schizophrenia                                                             | June 2012–June 2018   |
| *Performance in Practice: Physician Practice Assessment Tool for the Assessment and Treatment of Adults at Risk for Suicide and Suicide-Related Behaviors | March 2011–March 2017 |
| *Performance in Practice: Clinical Module for the Care of Patients With Major Depressive Disorder                                                         | July 2012–July 2018   |
| Performance in Practice: Clinical Module for the Care of Patients With Posttraumatic Stress Disorder                                                      | Aug 2013–Aug 2019     |
| Improvement in Medical Practice (PIP): Physician Practice Assessment Tools for Screening of Adults With Substance Use Disorder                            | June 2015–June 2018   |
| Improvement in Medical Practice (PIP): Physician Practice Assessment Tool for the Assessment and Treatment of Adults With Substance Use Disorder          | June 2015–June 2018   |
